# Supplementary material for: Field-measured drag area is a key correlate of level cycling time trial performance
Source: PeerJ. 2015 Aug 11;3:e1144. doi: 10.7717/peerj.1144 (PMC4540006; doi:10.7717/peerj.1144)
Supplement: Appendix S2 [file peerj-03-1144-s002.xlsx]

## Sheet: Sheet1
																																					Time trial environment						Field-determined aerodynamics testing environment
	Subject	Speciality	Age	Years racing	BMI	% Body Fat	BMD	Height	Body Weight	BRS Weight	GXT Max HR	VO2peak	VO2peak	VO2peak pwr	VO2peak pwr/BW	VO2peak/AD	LT pwr	LT pwr/BW	LT/AD	Economy	AD	Ap	Calculated Cd	Time	Average Power	Power to BW	Power to BRSW	Power to AD	Power to Ap	TT %LT	TT %VO2peak	TT HR avg	TT HR max	HR %max	HR %LT	Bike type	Temp	Hum	Pb	Air Density	Avg TT cad	TT RPE	Temp	Hum	Pb	Air Density	Rr	Cr
	1	Climber GC	30	8	20.9107	6.5	1.168	179	68.18	78	190	5.1	74.8	410	6.01349	1301	300	4.40012	951.951	77.2881	0.315	0.304	1.03618	1778	329	4.82546	4.21795	1044.44	1082.24	109.667	80.2439	175	181	96.6851	106.883	TT	23	40	24.74	0.981003	93	17	17	24	24.92	1.01161	3.0775	0.004
	2	MTB	32	8	25.1612	13.4333	1.302	168	69.4	83	194	4.4091	62.1	308	4.43804	666.885	241	3.47262	521.816	71.0513	0.462	0.366	1.2623	2062	285	4.10663	3.43373	616.883	778.689	118.257	92.5325	180	191	94.2408	110.577	road	21	48	24.78	0.988968	94	18	20	45	24.86	0.996199	7.39284	0.0091
	3	Time Trial	27	7	24.4193	10.6667	1.33933	181	80.91	90.7	168	5.468	68.35	402	4.96848	1301.65	331	4.09097	1071.76	73.7043	0.309	0.348	0.887931	1764	354	4.37523	3.90298	1145.63	1017.24	106.949	88.0597	161	167	96.4072	108.041	road/bars	30	23.5	24.66	0.955777	86	18	20	69	24.92	0.996097	6.877	0.0077
	4	Time Trial	29	3	25.9455	12.0333	1.21233	181	87.27	98.4	179	4.9385	58.1	395	4.52618	1304.49	300	3.43761	990.749	73.6389	0.303	0.368	0.82337	1765	346	3.96471	3.51626	1141.91	940.217	115.333	87.5949	168	175	96	117.6	TT	30	23.5	24.66	0.955777	92	18	21	40	24.87	0.993469	5.5165	0.0057
	5	All-around	20	4	21.1073	10.6333	1.032	170	60.7	70.9	193	4.30111	70.51	344	5.66722	1333.05	269	4.43163	1042.41	76.3424	0.258	0.283	0.911661	1732	309	5.09061	4.35825	1197.67	1091.87	114.87	89.8256	182	188	96.8085	114.77	TT	25	30	24.75	0.975581	98	17	18	37	24.78	1.00111	2.70551	0.0039
	6	MTB	31	4	23.3887	16.4667	1.35333	173	70	78.9	186	4.5997	65.71	349	4.98571	771.89	250	3.57143	552.93	73.1716	0.452	0.405	1.11605	1990	274	3.91429	3.47275	606.195	676.543	109.6	78.51	177	186	95.1613	111.127	road	35	14	24.83	0.947669	83	17	19	40	24.81	0.99837	4.6305	0.006
	7	All-around	23	8	23.3887	10.2	1.367	175.26	68.5	77.8	197	5.01	73.14	381	5.56204	1147.02	310	4.52555	933.274	72.0926	0.332	0.305	1.08852	1894	319	4.65693	4.10026	960.843	1045.9	102.903	83.727	176	183	96.1749	101.517	TT	20	50	24.75	0.991245	95	17	10	35	24.82	1.03262	3.5876	0.0044
	8	All-around	24	5	27.6886	9.7	1.15	167	68	78	189	4.39	64.56	317	4.66176	902.125	230	3.38235	654.538	70.1916	0.351	0.339	1.0354	1929	306	4.5	3.92308	871.795	902.655	133.043	92.4471	175	182	96.1538	112.755	road/bars	21	32	24.86	0.993957	88	18	5	45	24.75	1.0484	5.8324	0.0075
	9	All-around	20	4	19.0381	10.2333	1.214	179	62	71.6	183	4.38834	71.94	320	5.16129	1117.91	250	4.03226	873.366	72.4498	0.286	0.281	1.01779	1873	282	4.54839	3.93855	986.014	1003.56	112.8	88.125	176	182	96.7033	116.431	TT	23	35	24.81	0.984417	92	17	18	37	24.78	1.00111	4.17589	0.006
	10	All-around	29	5	24.811	10.1333	1.40833	184	85	93.6	185	5.22816	62.24	379	4.45882	965.773	280	3.29412	713.5	69.3662	0.392	0.375	1.04533	1927	323	3.8	3.45085	823.98	861.333	115.357	85.2243	167	178	93.8202	109.729	road/bars	23	35	24.78	0.983221	95	18	20	50	25	1.00131	5.96248	0.0065
	11	All-around	35	20	24.0317	12.6	1.28167	179	78.63	88.6	185	4.17186	54.18	372	4.73102	939.353	240	3.05227	606.034	73.0923	0.396	0.35	1.13143	1985	259	3.29391	2.92325	654.04	740	107.917	69.6237	175	185	94.5946	116.527	road/bars	30	23.5	24.66	0.955777	101	20	21	40	24.87	0.993469	5.80303	0.0068
	12	Climber	36	18	20.2883	8.53333	1.06	174.42	63.18	70.2	194	4.719	76.45	365	5.77714	1371.16	276	4.36847	1036.82	75.0616	0.266	0.291	0.914089	1717	308	4.87496	4.38746	1157.89	1058.42	111.594	84.3836	183	192	95.3125	111.953	TT	30	23.5	24.66	0.955777	82	19	23	36	24.78	0.983096	5.54688	0.0079
	13	All-around	29	3	23.5078	12.8667	1.15533	165	64.9	73.9	176	3.90528	61.02	333	5.13097	901.849	253	3.89831	685.189	78.4057	0.369	0.368	1.00272	1942	270	4.16025	3.65359	731.707	733.696	106.719	81.0811	172	179	96.0894	116.082	road	30	23.5	24.66	0.955777	96	19	20	69	24.92	0.996097	4.31751	0.0062
	14	All-around	24	12	21.847	10.2	1.24	179	71	80.2	182	4.8804	69.72	395	5.56338	1038.52	309	4.35211	812.415	78.1743	0.38	0.402	0.945274	1885	312	4.39437	3.89027	821.053	776.119	100.971	78.9873	168	180	93.3333	109.884	road	30	23.5	24.66	0.955777	102	17.5	23	43	24.87	0.98581	4.93689	0.0063
	15	Climber	26	10	21.3578	10.3667	1.18367	169	59.54	68.9	186	4.41579	72.39	337	5.66006	1064.49	234	3.93013	739.138	72.2814	0.317	0.272	1.16544	1847	285	4.7867	4.13643	899.054	1047.79	121.795	84.5697	173	179	96.648	112.897	TT	22	38	25.13	1.00045	81	17	20	50	25	1.00131	4.5549	0.0068
	16	Criterium	26	13	22.5249	12.1	1.271	169	65.5	74.3	173	4.74394	73.74	347	5.29771	1153.42	275	4.19847	914.095	71.7631	0.301	0.312	0.964744	1806	294	4.48855	3.95693	976.744	942.308	106.909	84.7262	161	171	94.152	110.296	TT	23	35	24.81	0.984417	87	17	22	61	24.95	0.990547	5.5441	0.0076
	17	All-around	26	7	23.5115	8.2	1.22167	179	76.13	87.5	170	4.70984	62.52	358	4.70248	853.157	251	3.29699	598.163	70.1518	0.42	0.444	0.945946	1959	327	4.29528	3.73714	778.571	736.486	130.279	91.3408	166	173	95.9538	113.189	road	30	23.5	24.66	0.955777	93	17	19	42	24.83	0.99898	5.16718	0.0053
	18	All-around	33	4	24.9108	6	1.281	164	65.9	76.4	182	5.05314	75.42	394	5.97876	1110.6	265	4.02124	746.98	69.1097	0.355	0.286	1.24126	1865	315	4.77997	4.12304	887.324	1101.4	114.545	79.9492	172	181	95.0276	113.012	TT	22	38	25.13	1.00045	89	16	19	42	24.83	0.99898	3.22109	0.0043
	19	Climber	24	10	21.9713	6.76667	1.06433	172	64.9	74.3	176	4.34655	66.87	352	5.42373	965.516	285	4.39137	781.739	78.8538	0.365	0.327	1.11621	2075	274	4.22188	3.68775	750.685	837.92	96.1404	77.8409	175	185	94.5946	111.913	road	30	23.5	24.66	0.955777	85	14	19	42	24.83	0.99898	3.9187	0.0054
